# Supplementary material for: Visualizing the changes in the cellular redox environment using a novel profluorescent rhodamine nitroxide probe
Source: Royal Society of Chemistry journal article supplement (doi:10.1039/c3nj00674c), 2013-01-01
Supplement: c3nj00674c.pdf [file c3nj00674c.pdf]

## Supplementary Information for New Journal of Chemistry

Visualizing the changes of cellular redox environment using a novel  
profluorescent rhodamine nitroxide probe

Linying Cao<sup>a,b</sup>, Qingfeng Wu<sup>c</sup>, Qiang Li<sup>c</sup>, Shijun Shao<sup>a</sup>, Yong Guo<sup>a\*</sup>

<sup>a</sup>Key Laboratory of Chemistry of Northwestern Plant Resources and Key Laboratory for Natural Medicine of Gansu Province, Lanzhou institute of Chemical Physics, Chinese Academy of Sciences, Lanzhou 730000, P. R. China.

<sup>b</sup>University of Chinese Academy of Sciences, Beijing 100039, PR China

<sup>c</sup>Institute of Modern Physics Chinese Academy of Sciences No.509 Nanchang Road Lanzhou 730000, P. R. China.

\* Corresponding author. Tel: (+) 86 931 4968274. Fax: (+) 86-931-8277088.

E-mail Address: [guoyong@licp.cas.cn](mailto:guoyong@licp.cas.cn).

## Experimental Section

### Materials and methods

4-hydroxy-2, 2, 6, 6-tetramethyl-piperidinoxy free radical (4-OH-TEMPO), Rhodamine B, 2DG, GSH, ascorbic acid, cysteine (Cys) and uric acid were purchased from Sigma-Aldrich. HepG2 and L02 cells were purchased from the Cell Bank of Type Culture Collection of the Chinese Academy of Sciences. All reagents used were of analytical grade or chromatographically pure.

ESI-MS studies were carried out with an Esquire 5000 spectrometer and NMR spectra were performed on a Varian INOVA 400 MHz spectrometer. The fluorescence spectra were recorded on a Perkin Elmer LS55 spectrometer while the fluorescence and bright field images were acquired with Olympus BX51.

### Synthesis of the probe

Rhodamine B (0.27 mmol) was mixed with equimolar 4-OH-TEMPO in dichloromethane, and then 4-dimethylamiopyridine (DMAP, 0.027 mmol) and dicyclohexyl carbodiimide (DCC, 0.27 mmol) were added as catalyst and dehydrating agent. The mixture was stirred under an Ar atmosphere for 24 h at ambient. After removing the solvent under vacuum, the residue was purified by chromatography on neutral aluminum oxide column (eluent: CH<sub>2</sub>Cl<sub>2</sub>/CH<sub>3</sub>OH 20/1, v/v). The probe was obtained in 31% yield and stored in a -20 °C freezer. <sup>1</sup>H NMR (400 MHz, CDCl<sub>3</sub>, tetramethylsilane (TMS)): δ=6.7-8.2 (aryl H, 11 H), 3.4-3.7 (NCH<sub>2</sub>; OCH, 9 H), 1.2-1.7 ppm (CH<sub>3</sub>; CH<sub>2</sub>, 24 H); MS (ESI-MS): m/z calcd: 597.36, found: 597.5 [M]<sup>+</sup>.

### **HPLC analysis of the reducing product**

The mixture of the probe and ascorbic acid was stirred for 2 h at ambient, and then subjected to the HPLC analysis with the conditions: eluent, CH<sub>3</sub>OH (90%)/ammonium acetate (0.01 M, 10%) aqueous solution; flow rate, 1.0mL/min; injection volume, 20 µl, temperature, 25°C, analytical column, octadecyl (C18). The elution was monitored by FLD (E<sub>x</sub>556 nm, E<sub>m</sub> 590 nm.) and DAD (absorbance at 550 nm) detector.

### **Fluorescence imaging**

HepG2 and L02 cells were cultured in MEM medium supplemented with 10% fetal calf serum and incubated at 37°C in 5% CO<sub>2</sub>/air atmosphere. Cells were seeded into culture dishes with appropriate density and cultured for 12 h, then choose the well-grown cells and treated accordingly. The probe was added to all cell samples at a final concentration of 2 µM to 4 µM from a 2 mM stock solution. A fresh stock solution of 2DG (0.2 M) was prepared in H<sub>2</sub>O and appropriate concentrations were added to the cell samples.

The cells were treated with 2DG for 4 h before the probe was added, and then incubated continue for 2 h. After all the treatment, the medium was removed from the cells and washed 3 times with 10% PBS. Fluorescence and bright field images were acquired with Olympus BX51 with 10× eye lens and 20× objective lens.

## Results and discussion

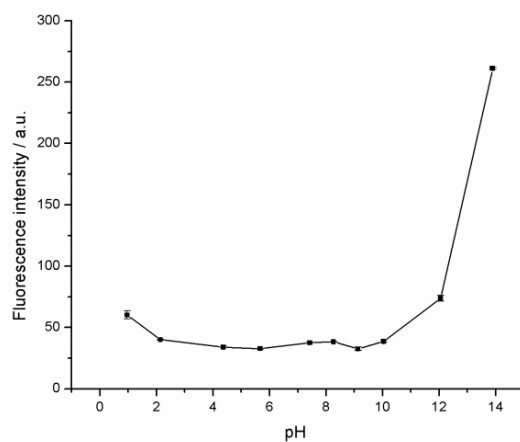

Fig.S1 The effect of pH (1~14) on the fluorescence intensity of the probe. The pH was controlled by HCl or NaOH and the final concentration of the probe was 2.5  $\mu\text{M}$ .

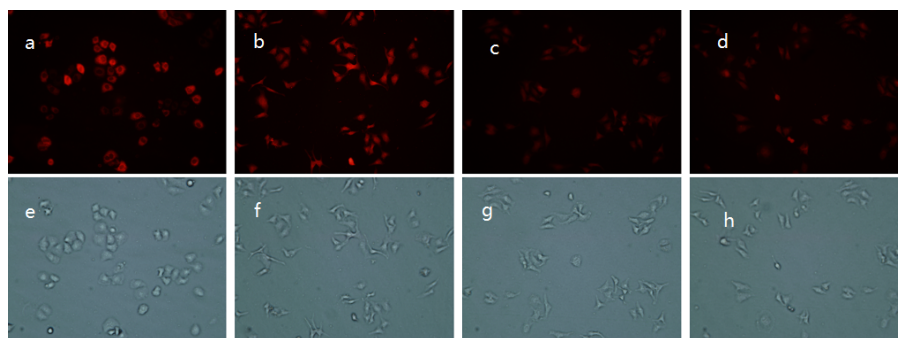

Fig.S2 Fluorescence and bright field images of HepG2 cells treated with 2DG. Fluorescence imaging of cells treated with 0 mM (a), 2 mM (b), 10 mM (c), 20 mM (d) 2DG for 4 h before incubated with 4  $\mu\text{M}$  probe for another 2 h, e, f, g, h were the corresponding bright field images.

### Generic Display Report

**Analysis Info**

Analysis Name D:\Data\YANGY\_MS\New\XUJIAN110427.d  
Method LOWmass.m  
Sample Name M-597  
Comment

Acquisition Date 4/27/2011 4:16:25 PM

Operator ESQ6K  
Instrument esquire6000

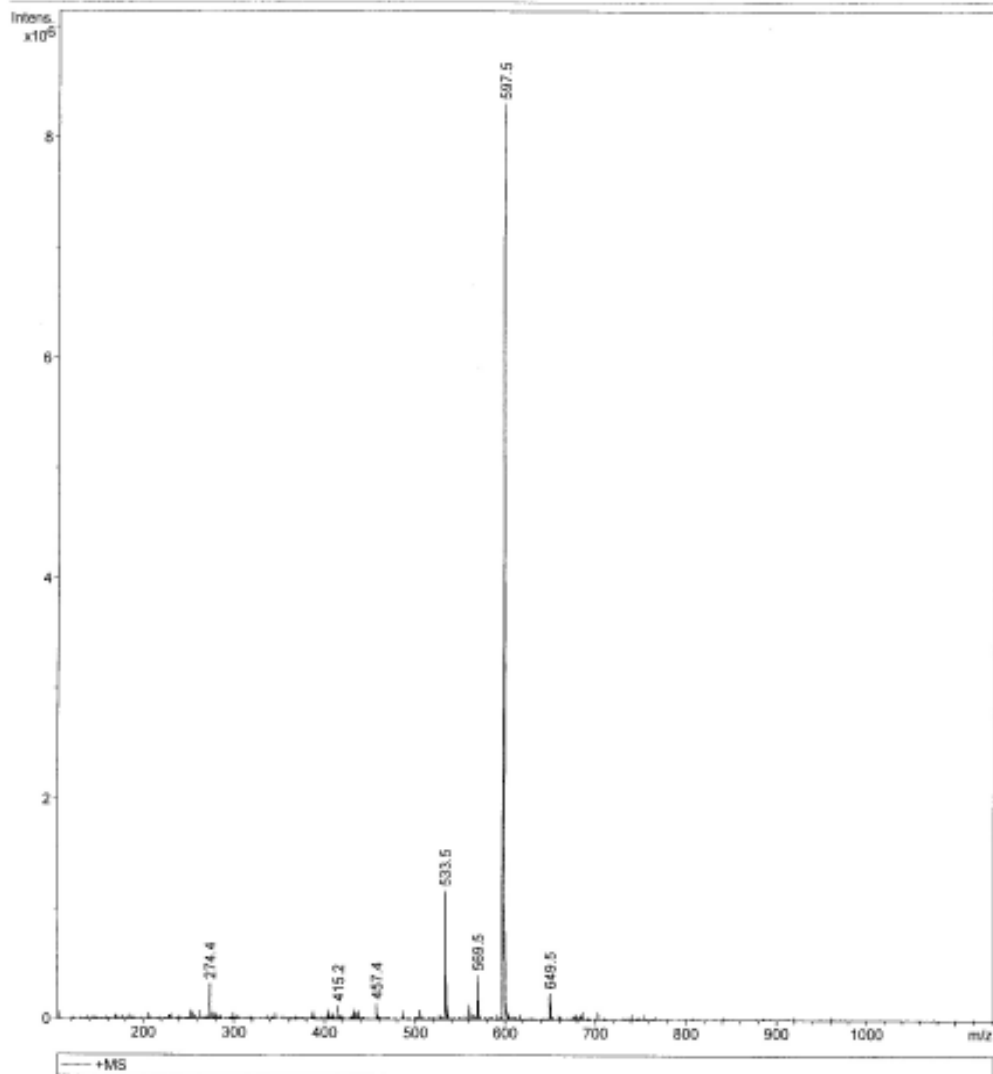

Fig.S3 HRMS spectra of the probe
